# Supplementary material for: Post-stroke fatigue: a problem of altered corticomotor control?
Source: HighWire-hosted journal article supplement (doi:10.1136/jnnp-2015-310431), 2015-04-17
Supplement: jnnp-2015-310431supp.pdf [file jnnp-2015-310431supp.pdf]

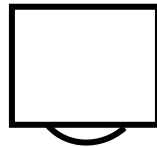

Cue light

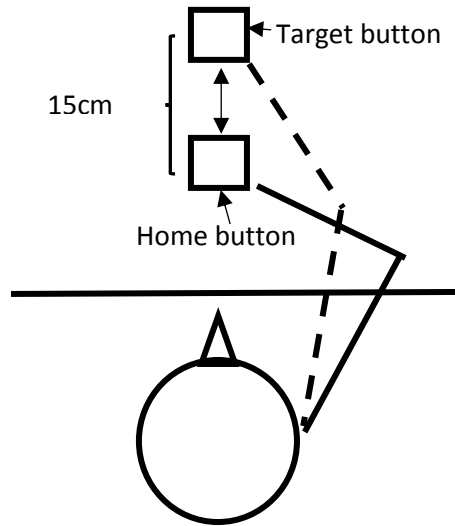

**A**

Simple reaction and movement time task

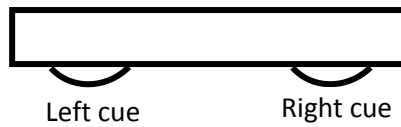

**B**

Choice reaction time task

This figure illustrates the experimental set up for the Simple Reaction Time / Movement Time tasks **(A)** and the Choice Reaction Time task **(B)**.
