# Supplementary material for: Post-stroke fatigue: a problem of altered corticomotor control?
Source: HighWire-hosted journal article supplement (doi:10.1136/jnnp-2015-310431), 2015-04-17
Supplement: jnnp-2015-310431supp_tables.pdf [file jnnp-2015-310431supp_tables.pdf]

| <b>Gender</b>              | <b>Male</b>        |                     | <b>Female</b>      |                   |
|----------------------------|--------------------|---------------------|--------------------|-------------------|
| <b>Affected side</b>       | <b>Right</b>       | <b>Left</b>         | <b>Right</b>       | <b>Left</b>       |
| N                          | 16                 | 11                  | 7                  | 7                 |
| Age (years $\pm$ SD)       | 57.86 $\pm$ 14.55  | 66.54 $\pm$ 9.04    | 64.84 $\pm$ 12.11  | 63.51 $\pm$ 7.60  |
| Post stroke (months)       | 75.23 $\pm$ 130.69 | 118.20 $\pm$ 178.46 | 63.63 $\pm$ 57.53  | 80.05 $\pm$ 58.76 |
| NHPT (% unaffected)        | 90.49 $\pm$ 28.86  | 89.19 $\pm$ 37.61   | 99.01 $\pm$ 17.20  | 73.29 $\pm$ 27.85 |
| Grip (% unaffected)        | 102.06 $\pm$ 25.70 | 88.60 $\pm$ 20.29   | 105.26 $\pm$ 16.72 | 80.71 $\pm$ 25.59 |
| ARAT (% unaffected)        | 96.60 $\pm$ 28.86  | 99.36 $\pm$ 1.62    | 99.50 $\pm$ 1.33   | 100 $\pm$ 0       |
| SDMT (mental speed in Sec) | 1.37 $\pm$ 0.41    | 1.28 $\pm$ 0.34     | 1.65 $\pm$ 0.89    | 1.34 $\pm$ 0.56   |

**Table 1:** This table summarises the patient characteristics: A total of 41 stroke survivors participated in the study. Participants were all high functioning with good physical strength (hand grip using dynamometer), dexterity (Nine Hole Peg Test) and functional ability (Action Research Arm Test) in their affected limbs when compared to their unaffected side. They were also cognitively high functioning as evidenced by a high information processing speed (Symbol Digit Modalities Test: –time taken to code a symbol [sec] – time taken to copy a symbol [sec]). All patients had a score of  $\leq 11$  on the Hospital and Anxiety Depression Scale.
